# Supplementary material for: Synthesis, characterization, and cytotoxic properties of mono- and di-nuclear cobalt(ii)-polypyridyl complexes
Source: Royal Society of Chemistry journal article supplement (doi:10.1039/c8dt00577j), 2018-01-01
Supplement: c8dt00577j1.pdf [file c8dt00577j1.pdf]

## Supporting Information for

# Synthesis, characterization, and cytotoxic properties of mono- and di-nuclear cobalt(II)-polypridyl complexes

Arvin Eskandari,<sup>a</sup> Arunangshu Kundu,<sup>b</sup> Chunxin Lu,<sup>c</sup> Sushobhan Ghosh,<sup>b\*</sup> and Kogularamanan Suntharalingam<sup>a\*</sup>

<sup>a</sup> Department of Chemistry, King's College London, London, UK

<sup>b</sup> Department of Chemistry, Gauhati University, Guwahati, India

<sup>c</sup> Guangxi Colleges and Universities Key Laboratory of Beibu Gulf Oil and Natural Gas Resource Effective Utilization, Qinzhou University, Qinzhou 535011, China

\* To whom correspondence should be addressed:

Email: kogularamanan.suntharalingam@kcl.ac.uk and sushobhan.iisc@gmail.com

### Table of Content

#### Experimental Details

|                  |                                                                                                                                                                                                                                                                                                                                                                                                                                                                                                                                                                                                                 |
|------------------|-----------------------------------------------------------------------------------------------------------------------------------------------------------------------------------------------------------------------------------------------------------------------------------------------------------------------------------------------------------------------------------------------------------------------------------------------------------------------------------------------------------------------------------------------------------------------------------------------------------------|
| <b>Fig. S1</b>   | High resolution ESI mass spectrum (positive mode) of <b>1</b> .                                                                                                                                                                                                                                                                                                                                                                                                                                                                                                                                                 |
| <b>Fig. S2</b>   | High resolution ESI mass spectrum (positive mode) of <b>2</b> .                                                                                                                                                                                                                                                                                                                                                                                                                                                                                                                                                 |
| <b>Fig. S3</b>   | High resolution ESI mass spectrum (negative mode) of <b>3</b> .                                                                                                                                                                                                                                                                                                                                                                                                                                                                                                                                                 |
| <b>Fig. S4</b>   | X-ray structure of the mono-nuclear cobalt(II) complex, <b>1</b> . Ellipsoids are shown at 30% probability, O atoms are shown in red, C in grey, N in dark blue, and Co in light blue. H atoms have been omitted for clarity.                                                                                                                                                                                                                                                                                                                                                                                   |
| <b>Fig. S5</b>   | X-ray structure of the di-nuclear cobalt(II) complex, <b>3</b> . Ellipsoids are shown at 30% probability, O atoms are shown in red, C in grey, N in dark blue, and Co in light blue. H atoms have been omitted for clarity.                                                                                                                                                                                                                                                                                                                                                                                     |
| <b>Table S1.</b> | Crystallographic data of <b>1</b> and <b>3</b> .                                                                                                                                                                                                                                                                                                                                                                                                                                                                                                                                                                |
| <b>Table S2.</b> | Selected bond lengths (Å) and angles (°) for <b>1</b> .                                                                                                                                                                                                                                                                                                                                                                                                                                                                                                                                                         |
| <b>Table S3.</b> | Selected bond lengths (Å) and angles (°) for <b>3</b> .                                                                                                                                                                                                                                                                                                                                                                                                                                                                                                                                                         |
| <b>Table S4.</b> | Experimentally determined LogP values for <b>1-3</b> .                                                                                                                                                                                                                                                                                                                                                                                                                                                                                                                                                          |
| <b>Fig. S6</b>   | UV-vis spectrum of <b>2</b> (25 µM) in DMSO over the course of 24 h at 37 °C.                                                                                                                                                                                                                                                                                                                                                                                                                                                                                                                                   |
| <b>Fig. S7</b>   | Concentration-dependent DNA cleavage by <b>1</b> and <b>3</b> after a 16 h incubation period. (A) Lane 1: DNA only; Lane 2-4: DNA + <b>1</b> , 5, and 10 µM of <b>1</b> ; (B) Lane 1: DNA only; Lane 2-4: DNA + <b>1</b> , 5, and 10 µM of <b>3</b> .                                                                                                                                                                                                                                                                                                                                                           |
| <b>Fig. S8</b>   | Effect of ascorbic acid on <b>1</b> - and <b>3</b> -mediated DNA cleavage after 16 h incubation, (A) Lane 1: DNA only, Lane 2-4: DNA + <b>1</b> , 5, and 10 µM of <b>1</b> with 10 equivalents of ascorbic acid. (B) Lane 1: DNA only, Lane 2-4: DNA + <b>1</b> , 5, and 10 µM of <b>3</b> with 10 equivalents of ascorbic acid.                                                                                                                                                                                                                                                                                |
| <b>Fig. S9</b>   | Inhibition of <b>1</b> - and <b>3</b> -mediated DNA cleavage by ROS scavengers after 16 h incubation. (A) Lane 1: DNA only, Lane 2: DNA + <b>1</b> (10 µM) with 10 equivalents of ascorbic acid, Lane 3-6: DNA + <b>1</b> (10 µM) with 10 equivalents of ascorbic acid + NaN <sub>3</sub> (40 mM), KI (40 mM), DMSO (10 mM), or <sup>t</sup> BuOH (10 mM). (B) Lane 1: DNA only, Lane 2: DNA + <b>3</b> (10 µM) with 10 equivalents of ascorbic acid, Lane 3-6: DNA + <b>3</b> (10 µM) with 10 equivalents of ascorbic acid + NaN <sub>3</sub> (40 mM), KI (40 mM), DMSO (10 mM), or <sup>t</sup> BuOH (10 mM). |

- Fig. S10** Inhibition of **1**- and **3**-mediated DNA cleavage by DNA minor and major groove binders and intercalators after 16 h incubation. (A) Lane 1: DNA only, Lane 2: DNA + **1** (10  $\mu$ M) with 10 equivalents of ascorbic acid, Lane 3: DNA + **1** (10  $\mu$ M) with 10 equivalents of ascorbic acid + methyl green (50  $\mu$ M), Lane 4: DNA + **1** (10  $\mu$ M) with 10 equivalents of ascorbic acid + DAPI (50  $\mu$ M), Lane 5: DNA + **1** (10  $\mu$ M) with 10 equivalents of ascorbic acid + TO (10  $\mu$ M). (B) Lane 1: DNA only, Lane 2: DNA + **3** (10  $\mu$ M) with 10 equivalents of ascorbic acid, Lane 3: DNA + **3** (10  $\mu$ M) with 10 equivalents of ascorbic acid + methyl green (50  $\mu$ M), Lane 4: DNA + **3** (10  $\mu$ M) with 10 equivalents of ascorbic acid + DAPI (50  $\mu$ M), Lane 5: DNA + **3** (10  $\mu$ M) with 10 equivalents of ascorbic acid + TO (10  $\mu$ M).
- Fig. S11** Representative UV-Vis trace of **1** (50  $\mu$ M) upon addition of ct-DNA (0 – 0.11 equivalence).
- Fig. S12** Representative reciprocal plot of  $D/\Delta\epsilon_{ap}$  versus D of **1** (50  $\mu$ M) upon addition of ct-DNA (0 – 0.11 eq.).
- Fig. S13** Representative UV-Vis trace of **3** (50  $\mu$ M) upon addition of ct-DNA (0 – 0.11 equivalence).
- Fig. S14** Representative reciprocal plot of  $D/\Delta\epsilon_{ap}$  versus D of **3** (50  $\mu$ M) upon addition of ct-DNA (0 – 0.11 eq.).
- Table S5.** Apparent binding constant ( $K_{bin}$ ) and quenching constant ( $K_q$ ) for the interaction of **1-3** with ct-DNA.
- Fig. S15** Emission spectra for ethidium bromide (1  $\mu$ M) bound to ct-DNA (20  $\mu$ M) upon addition of aliquots of **1** (0-50  $\mu$ M) and the corresponding  $F^0/F$  versus [Q] plot.
- Fig. S16** Emission spectra for ethidium bromide (1  $\mu$ M) bound to ct-DNA (20  $\mu$ M) upon addition of aliquots of **2** (0-50  $\mu$ M) and the corresponding  $F^0/F$  versus [Q] plot.
- Fig. S17** Emission spectra for ethidium bromide (1  $\mu$ M) bound to ct-DNA (20  $\mu$ M) upon addition of aliquots of **3** (0-50  $\mu$ M) and the corresponding  $F^0/F$  versus [Q] plot.
- Fig. S18** Representative dose-response curves for the treatment of U2OS cells with **1-3** after 72 h incubation.
- Fig. S19** Representative dose-response curves for the treatment of HepG2 cells with **1-3** after 72 h incubation.
- Fig. S20** Representative dose-response curves for the treatment of GM07575 cells with **1-3** after 72 h incubation.
- Fig. S21** Representative dose-response curves for the treatment of (A) U2OS or (B) HepG2 cells with cisplatin after 72 h incubation.
- Fig. S22** Representative dose-response curves for the treatment of (A) U2OS or (B) HepG2 cells with carboplatin after 72 h incubation.
- Fig. S23** Representative dose-response curves for the treatment of U2OS cells with **L**<sup>1</sup>, 4,4'-azopyridine, 4,4'-bipyridine, and  $\text{Co}(\text{NO}_3)_2 \cdot 6\text{H}_2\text{O}$  after 72 h incubation.
- Fig. S24** Representative dose-response curves for the treatment of HepG2 cells with **L**<sup>1</sup>, 4,4'-azopyridine, 4,4'-bipyridine, and  $\text{Co}(\text{NO}_3)_2 \cdot 6\text{H}_2\text{O}$  after 72 h incubation.
- Fig. S25** Cobalt content in U2OS cells treated with **1-3** (10  $\mu$ M for 24 h).
- Fig. S26** Representative dose-response curves for the treatment of U2OS cells with **4** in the presence of the p53 inhibitor, pifithrin- $\mu$  (10  $\mu$ M) after 72 h incubation.
- Fig. S27** Representative dose-response curves for the treatment of HepG2 cells with **4** in the presence of the p53 inhibitor, pifithrin- $\mu$  (10  $\mu$ M) after 72 h incubation.

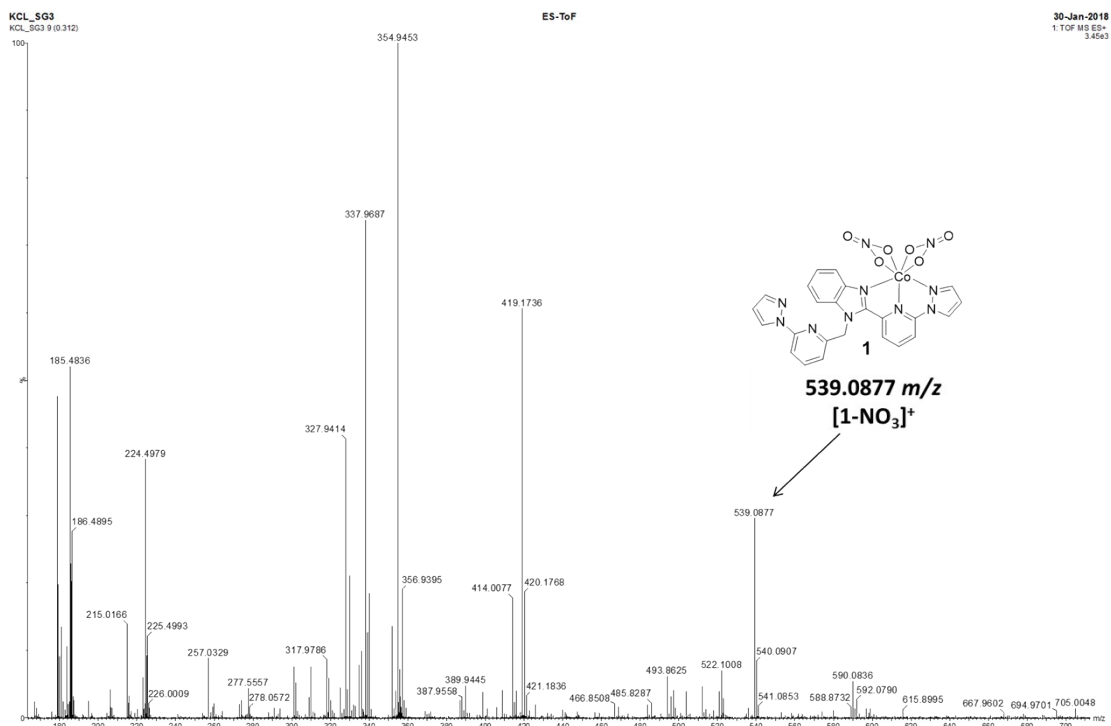

**Fig. S1** High resolution ESI mass spectrum (positive mode) of **1**.

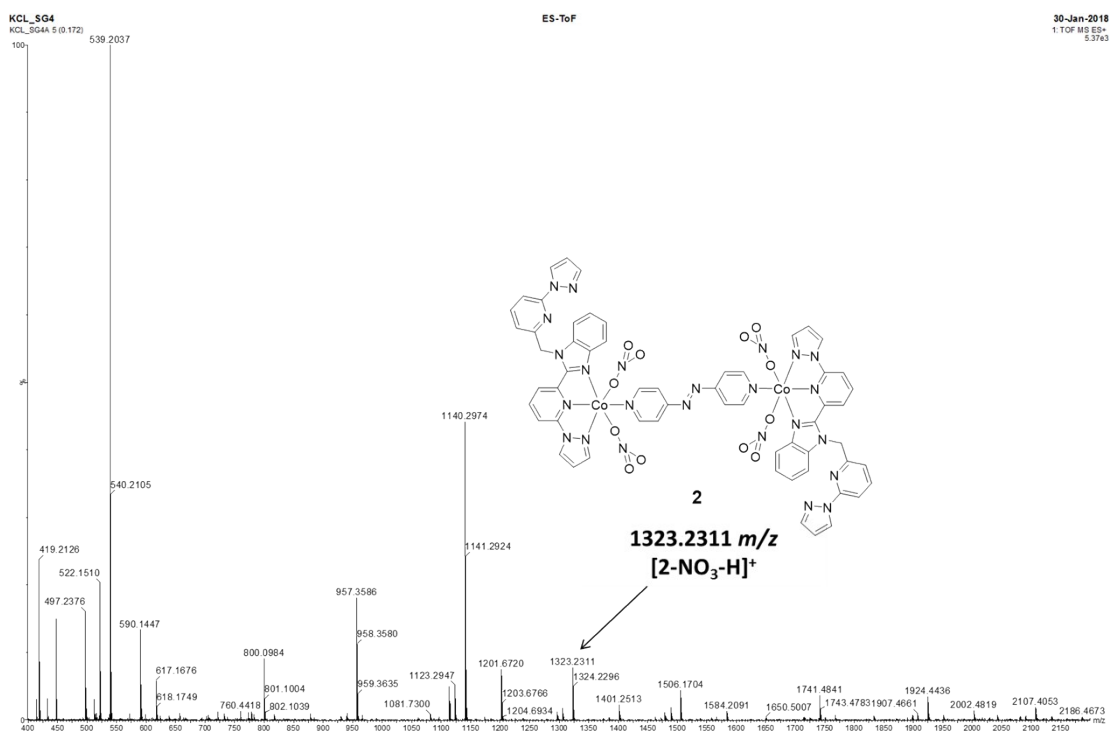

**Fig. S2** High resolution ESI mass spectrum (positive mode) of **2**.

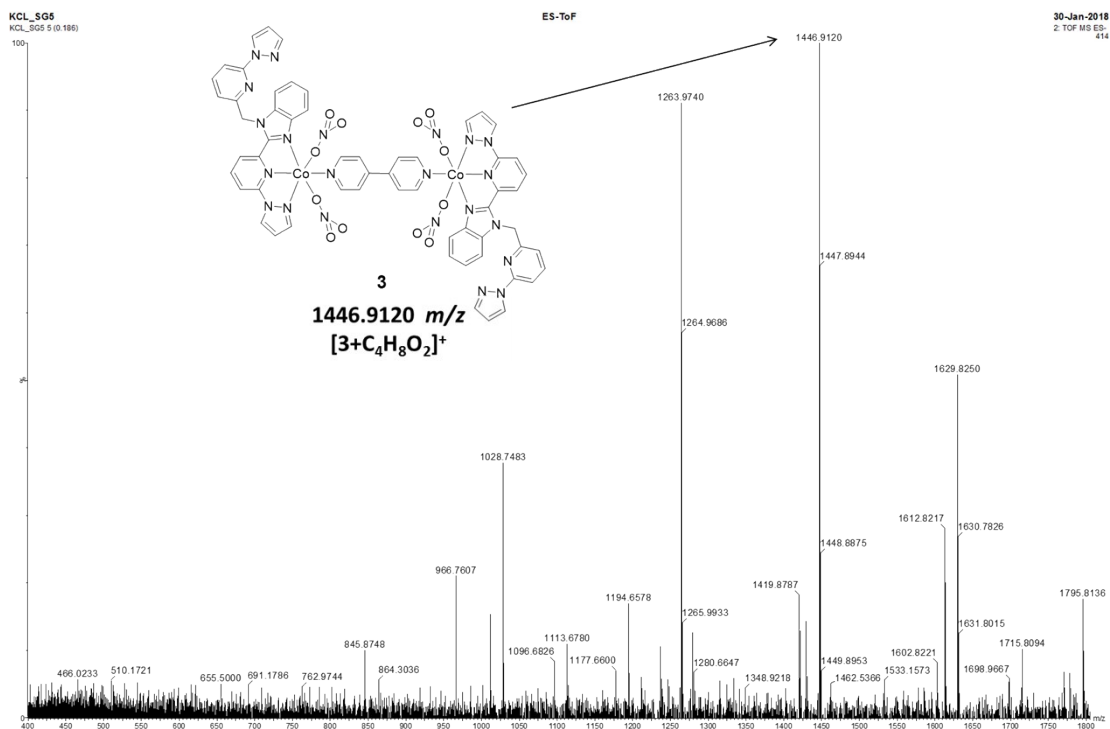

**Fig. S3** High resolution ESI mass spectrum (negative mode) of **3**.

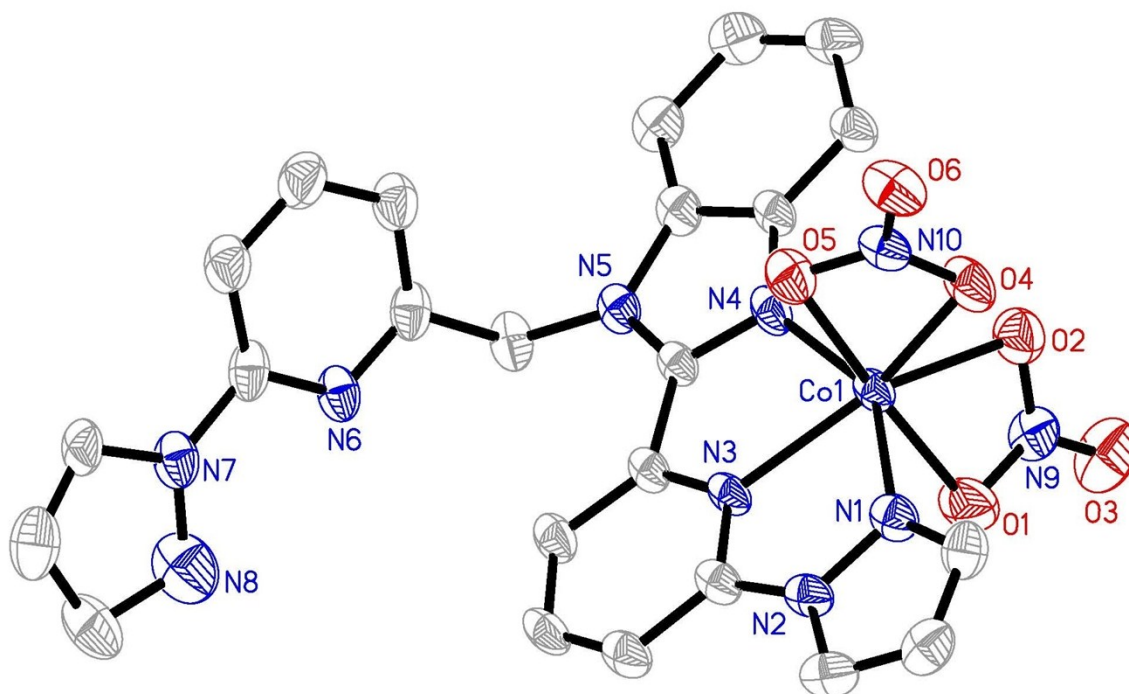

**Fig. S4** X-ray structure of the mono-nuclear cobalt(II) complex, **1**. Ellipsoids are shown at 30% probability, O atoms are shown in red, C in grey, N in dark blue, and Co in light blue. H atoms have been omitted for clarity.

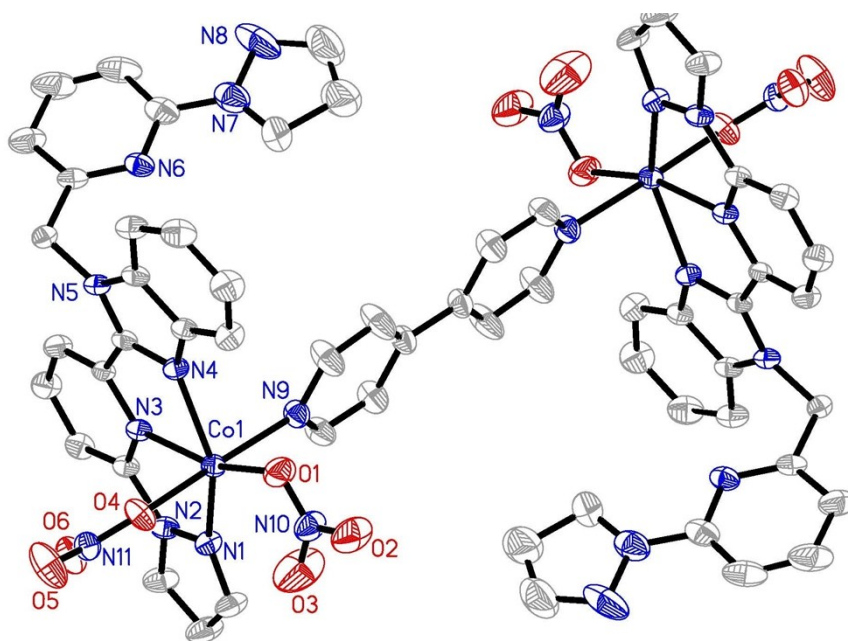

**Fig. S5** X-ray structure of the di-nuclear cobalt(II) complex, **3**. Ellipsoids are shown at 30% probability, O atoms are shown in red, C in grey, N in dark blue, and Co in light blue. H atoms have been omitted for clarity.

**Table S1.** Crystallographic data of **1** and **3**.

|                                                     | <b>1</b>                                                         | <b>3</b>                                                                        |
|-----------------------------------------------------|------------------------------------------------------------------|---------------------------------------------------------------------------------|
| Formula                                             | C <sub>24</sub> H <sub>18</sub> CoN <sub>10</sub> O <sub>6</sub> | C <sub>58</sub> H <sub>44</sub> Co <sub>2</sub> N <sub>22</sub> O <sub>12</sub> |
| <i>W</i>                                            | 601.41                                                           | 1359.01                                                                         |
| Crystal system                                      | triclinic                                                        | triclinic                                                                       |
| Space group                                         | <i>P</i> -1                                                      | <i>P</i> -1                                                                     |
| <i>a</i> , Å                                        | 9.2563(5)                                                        | 7.7180(12)                                                                      |
| <i>b</i> , Å                                        | 9.5206(5)                                                        | 14.973(2)                                                                       |
| <i>c</i> , Å                                        | 15.9254(11)                                                      | 15.659(2)                                                                       |
| $\alpha$ , deg.                                     | 100.846(3)                                                       | 106.656(8)                                                                      |
| $\beta$ , deg.                                      | 99.597(3)                                                        | 99.420(8)                                                                       |
| $\gamma$ , deg.                                     | 108.983(2)                                                       | 101.815(8)                                                                      |
| <i>V</i> , Å <sup>3</sup>                           | 1263.54(13)                                                      | 1648.5(4)                                                                       |
| <i>Z</i>                                            | 2                                                                | 1                                                                               |
| <i>D</i> <sub>calcd</sub> , Mg/m <sup>3</sup>       | 1.581                                                            | 1.369                                                                           |
| Reflections collected                               | 12533                                                            | 20597                                                                           |
| Reflections independent ( <i>R</i> <sub>int</sub> ) | 5787 (0.0522)                                                    | 5761 (0.0467)                                                                   |
| Goodness-of-fit on <i>F</i> <sup>2</sup>            | 1.011                                                            | 1.050                                                                           |
| <i>R</i> ( <i>I</i> > 2σ <i>I</i> )                 | 0.0468, 0.1131                                                   | 0.0511, 0.1409                                                                  |

**Table S2.** Selected bond lengths (Å) and angles (°) for **1**.

|                 |            |                 |            |
|-----------------|------------|-----------------|------------|
| Co(1)-O(1)      | 2.2790(17) | Co(1)-N(4)      | 2.1039(18) |
| Co(1)-N(3)      | 2.1108(17) | Co(1)-N(1)      | 2.1461(19) |
| Co(1)-O(2)      | 2.1631(18) | Co(1)-O(4)      | 2.195(2)   |
| Co(1)-O(5)      | 2.2782(19) | N(4)-Co(1)-N(3) | 75.12(7)   |
| N(4)-Co(1)-N(1) | 148.95(7)  | N(3)-Co(1)-N(1) | 74.24(7)   |
| N(4)-Co(1)-O(2) | 117.81(7)  | N(3)-Co(1)-O(2) | 143.34(6)  |
| N(1)-Co(1)-O(2) | 85.07(8)   | N(4)-Co(1)-O(4) | 99.75(8)   |
| N(3)-Co(1)-O(4) | 90.94(7)   | N(1)-Co(1)-O(4) | 85.67(7)   |
| O(2)-Co(1)-O(4) | 117.74(8)  | N(4)-Co(1)-O(5) | 84.09(7)   |
| N(3)-Co(1)-O(5) | 136.82(7)  | N(1)-Co(1)-O(5) | 122.56(7)  |
| O(2)-Co(1)-O(5) | 79.84(7)   | O(4)-Co(1)-O(5) | 55.49(7)   |
| N(4)-Co(1)-O(1) | 86.66(7)   | N(3)-Co(1)-O(1) | 92.23(6)   |
| N(1)-Co(1)-O(1) | 89.63(7)   | O(2)-Co(1)-O(1) | 57.10(6)   |
| O(4)-Co(1)-O(1) | 173.40(8)  | O(5)-Co(1)-O(1) | 124.28(7)  |

**Table S3.** Selected bond lengths (Å) and angles (°) for **3**.

|                 |            |                 |            |
|-----------------|------------|-----------------|------------|
| Co(1)-O(1)      | 2.086(3)   | Co(1)-N(3)      | 2.121(3)   |
| Co(1)-O(4)      | 2.133(2)   | Co(1)-N(1)      | 2.151(3)   |
| Co(1)-N(4)      | 2.175(2)   | Co(1)-N(9)      | 2.183(3)   |
| O(1)-Co(1)-N(3) | 162.43(11) | O(1)-Co(1)-O(4) | 84.90(11)  |
| N(3)-Co(1)-O(4) | 94.67(10)  | O(1)-Co(1)-N(1) | 123.40(11) |
| N(3)-Co(1)-N(1) | 74.16(10)  | O(4)-Co(1)-N(1) | 94.78(10)  |
| O(1)-Co(1)-N(4) | 88.41(11)  | N(3)-Co(1)-N(4) | 74.03(10)  |
| O(4)-Co(1)-N(4) | 87.04(10)  | N(1)-Co(1)-N(4) | 148.18(10) |
| O(1)-Co(1)-N(9) | 87.40(11)  | N(3)-Co(1)-N(9) | 92.19(10)  |
| O(4)-Co(1)-N(9) | 172.14(10) | N(1)-Co(1)-N(9) | 90.79(10)  |
| N(4)-Co(1)-N(9) | 91.15(10)  |                 |            |

**Table S4.** Experimentally determined LogP values for **1-3**.

| Co(II) complex | LogP            |
|----------------|-----------------|
| <b>1</b>       | $0.94 \pm 0.33$ |
| <b>2</b>       | $1.91 \pm 0.12$ |
| <b>3</b>       | $1.03 \pm 0.02$ |

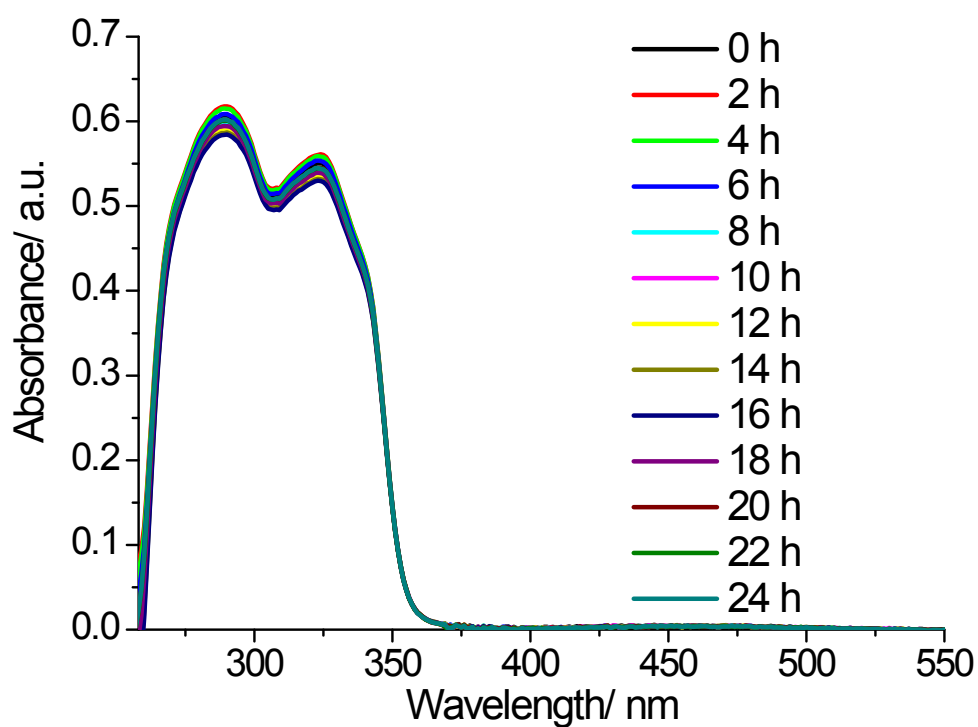

**Fig. S6** UV-vis spectrum of **2** (25  $\mu$ M) in DMSO over the course of 24 h at 37  $^{\circ}$ C.

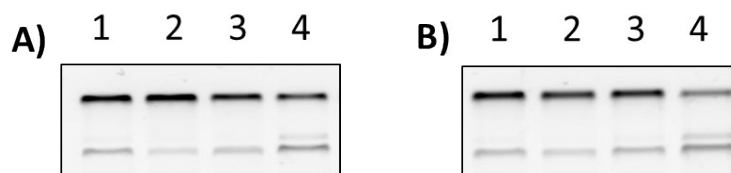

**Fig. S7** Concentration-dependent DNA cleavage by **1** and **3** after a 16 h incubation period. (A) Lane 1: DNA only; Lane 2-4: DNA + 1, 5, and 10  $\mu$ M of **1**; (B) Lane 1: DNA only; Lane 2-4: DNA + 1, 5, and 10  $\mu$ M of **3**.

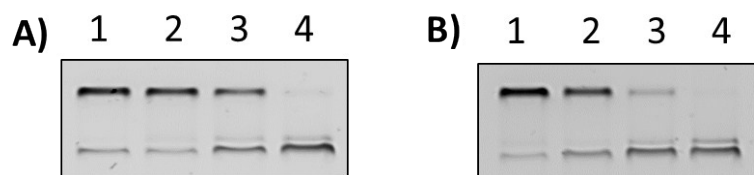

**Fig. S8** Effect of ascorbic acid on **1**- and **3**-mediated DNA cleavage after 16 h incubation, (A) Lane 1: DNA only, Lane 2-4: DNA + **1**, 5, and 10  $\mu\text{M}$  of **1** with 10 equivalents of ascorbic acid. (B) Lane 1: DNA only, Lane 2-4: DNA + **1**, 5, and 10  $\mu\text{M}$  of **3** with 10 equivalents of ascorbic acid.

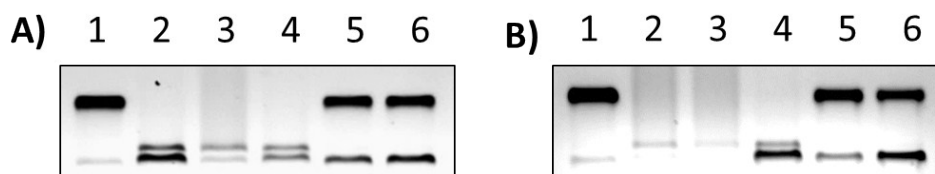

**Fig. S9** Inhibition of **1**- and **3**-mediated DNA cleavage by ROS scavengers after 16 h incubation. (A) Lane 1: DNA only, Lane 2: DNA + **1** (10  $\mu\text{M}$ ) with 10 equivalents of ascorbic acid, Lane 3-6: DNA + **1** (10  $\mu\text{M}$ ) with 10 equivalents of ascorbic acid +  $\text{NaN}_3$  (40 mM), KI (40 mM), DMSO (10 mM), or  $t\text{BuOH}$  (10 mM). (B) Lane 1: DNA only, Lane 2: DNA + **3** (10  $\mu\text{M}$ ) with 10 equivalents of ascorbic acid, Lane 3-6: DNA + **3** (10  $\mu\text{M}$ ) with 10 equivalents of ascorbic acid +  $\text{NaN}_3$  (40 mM), KI (40 mM), DMSO (10 mM), or  $t\text{BuOH}$  (10 mM).

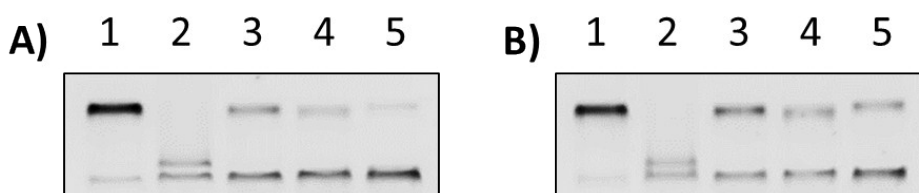

**Fig. S10** Inhibition of **1**- and **3**-mediated DNA cleavage by DNA minor and major groove binders and intercalators after 16 h incubation. (A) Lane 1: DNA only, Lane 2: DNA + **1** (10  $\mu\text{M}$ ) with 10 equivalents of ascorbic acid, Lane 3: DNA + **1** (10  $\mu\text{M}$ ) with 10 equivalents of ascorbic acid + methyl green (50  $\mu\text{M}$ ), Lane 4: DNA + **1** (10  $\mu\text{M}$ ) with 10 equivalents of ascorbic acid + DAPI (50  $\mu\text{M}$ ), Lane 5: DNA + **1** (10  $\mu\text{M}$ ) with 10 equivalents of ascorbic acid + TO (10  $\mu\text{M}$ ). (B) Lane 1: DNA only, Lane 2: DNA + **3** (10  $\mu\text{M}$ ) with 10 equivalents of ascorbic acid, Lane 3: DNA + **3** (10  $\mu\text{M}$ ) with 10 equivalents of ascorbic acid + methyl green (50  $\mu\text{M}$ ), Lane 4: DNA + **3** (10  $\mu\text{M}$ ) with 10 equivalents of ascorbic acid + DAPI (50  $\mu\text{M}$ ), Lane 5: DNA + **3** (10  $\mu\text{M}$ ) with 10 equivalents of ascorbic acid + TO (10  $\mu\text{M}$ ).



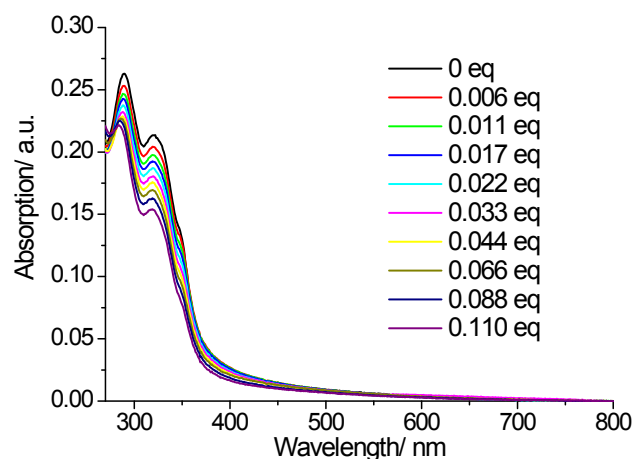

**Fig. S11** Representative UV-Vis trace of **1** (50 μM) upon addition of ct-DNA (0 – 0.11 equivalence).

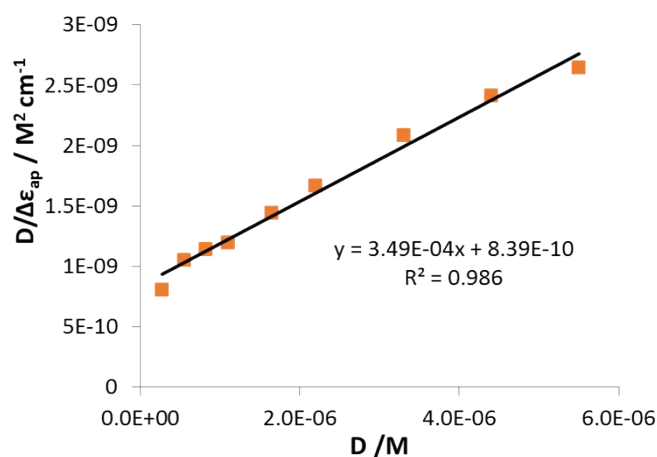

**Fig. S12** Representative reciprocal plot of  $D/\Delta\epsilon_{ap}$  versus  $D$  of **1** (50 μM) upon addition of ct-DNA (0 – 0.11 eq.).

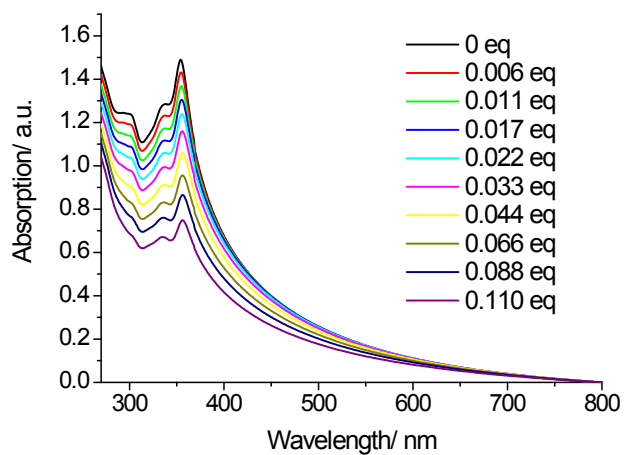

**Fig. S13** Representative UV-Vis trace of **3** (50 μM) upon addition of ct-DNA (0 – 0.11 equivalence).

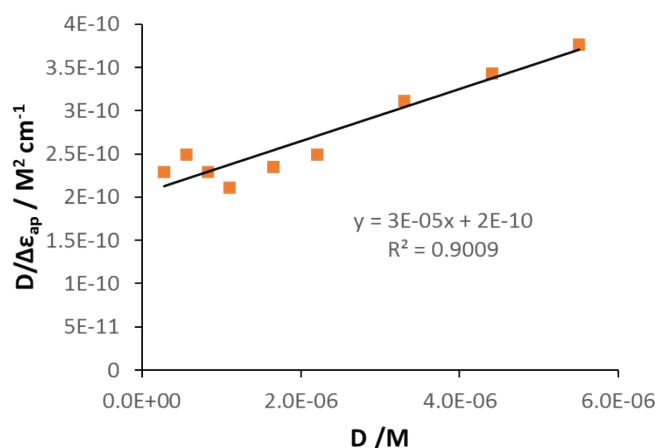

**Fig. S14** Representative reciprocal plot of  $D/\Delta\epsilon_{ap}$  versus  $D$  of **3** ( $50\ \mu\text{M}$ ) upon addition of ct-DNA ( $0 - 0.11\ \text{eq.}$ ).

**Table S5.** Apparent binding constant ( $K_{bin}$ ) and quenching constant ( $K_q$ ) for the interaction of **1-3** with ct-DNA.

| Co(II) complex | $K_{bin}/\text{M}^{-1}$     | $K_q/\text{M}^{-1}$         |
|----------------|-----------------------------|-----------------------------|
| <b>1</b>       | $4.20 \pm 0.05 \times 10^5$ | $3.11 \pm 0.14 \times 10^4$ |
| <b>2</b>       | $3.70 \pm 0.01 \times 10^5$ | $4.92 \pm 0.29 \times 10^4$ |
| <b>3</b>       | $1.42 \pm 0.11 \times 10^5$ | $5.27 \pm 0.33 \times 10^4$ |

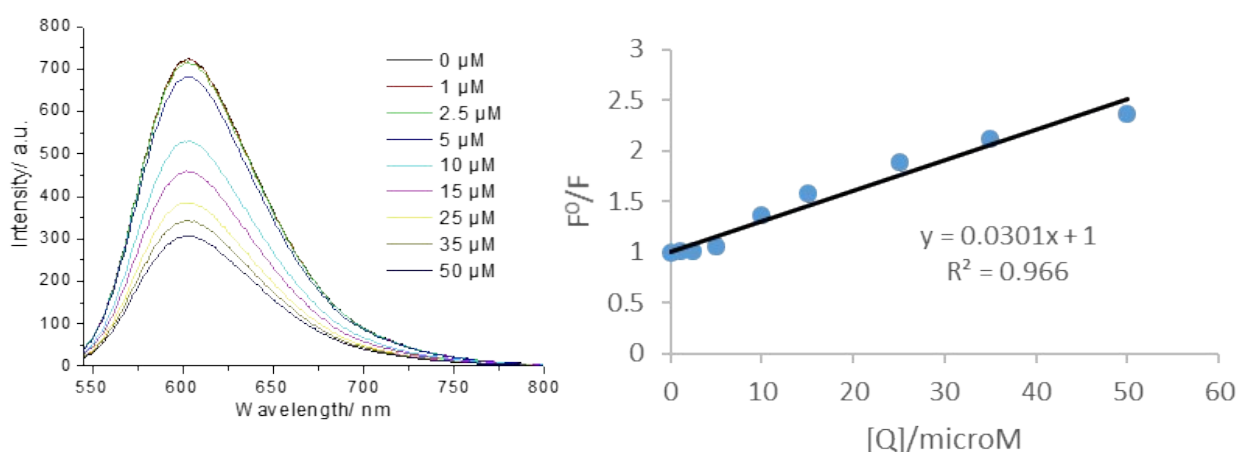

**Fig. S15** Emission spectra for ethidium bromide ( $1\ \mu\text{M}$ ) bound to ct-DNA ( $20\ \mu\text{M}$ ) upon addition of aliquots of **1** ( $0-50\ \mu\text{M}$ ) and the corresponding  $F^0/F$  versus  $[Q]$  plot.

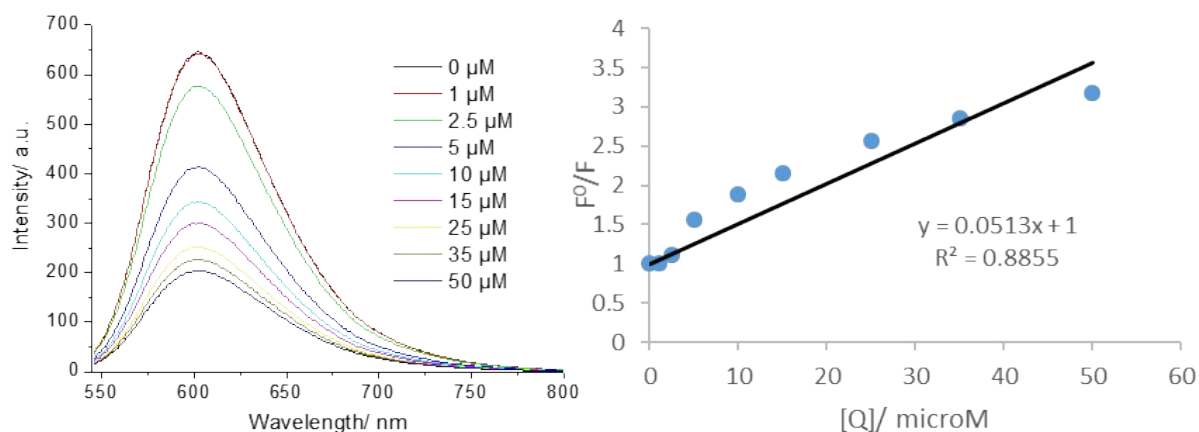

**Fig. S16** Emission spectra for ethidium bromide (1  $\mu\text{M}$ ) bound to ct-DNA (20  $\mu\text{M}$ ) upon addition of aliquots of **2** (0-50  $\mu\text{M}$ ) and the corresponding  $F^0/F$  versus  $[Q]$  plot.

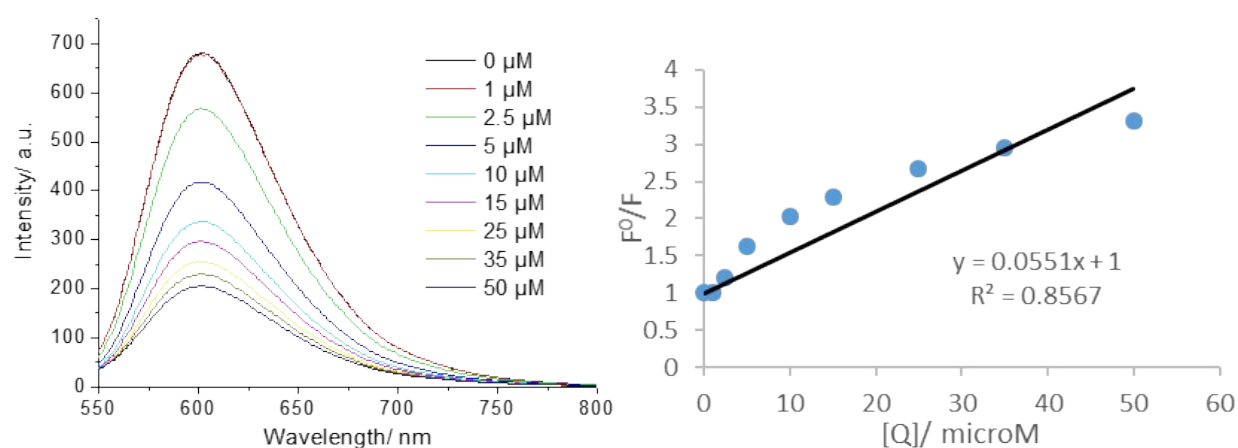

**Fig. S17** Emission spectra for ethidium bromide (1  $\mu\text{M}$ ) bound to ct-DNA (20  $\mu\text{M}$ ) upon addition of aliquots of **3** (0-50  $\mu\text{M}$ ) and the corresponding  $F^0/F$  versus  $[Q]$  plot.

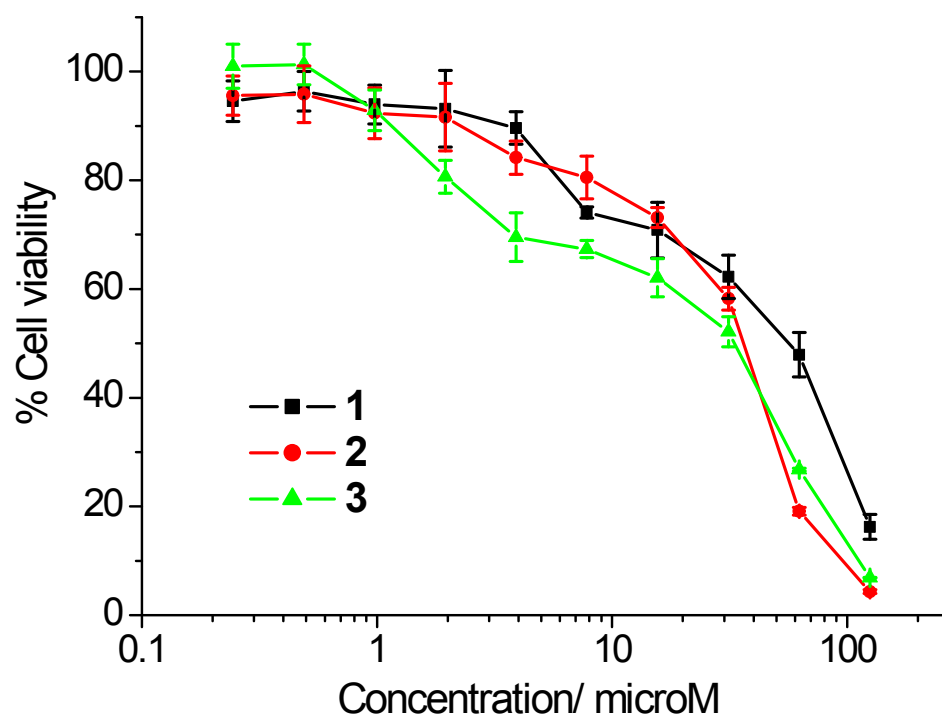

**Fig. S18** Representative dose-response curves for the treatment of U2OS cells with **1-3** after 72 h incubation.

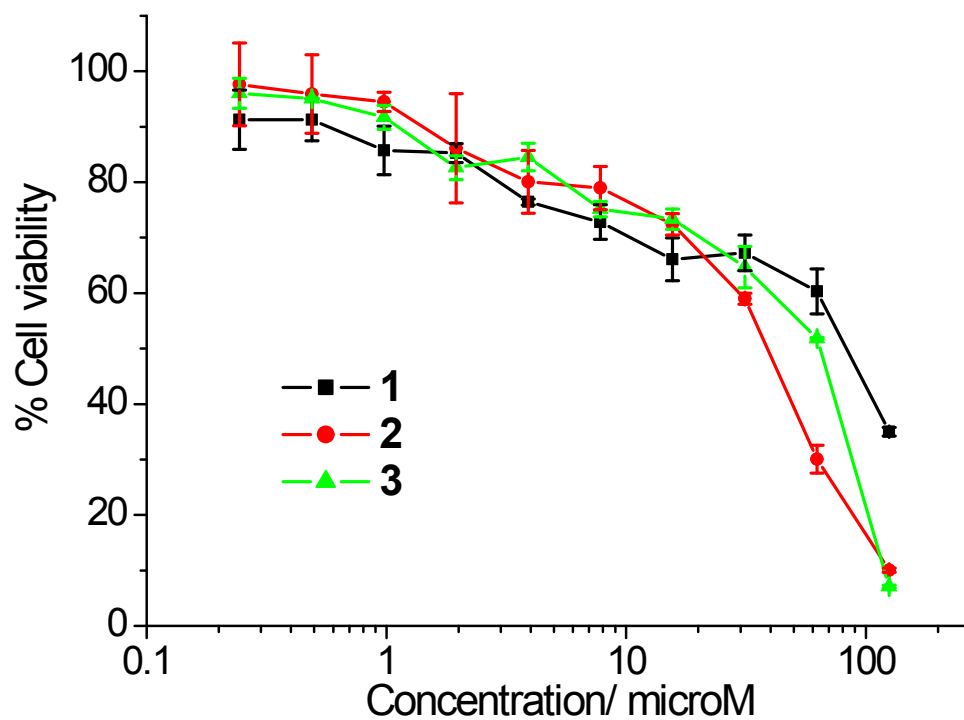

**Fig. S19** Representative dose-response curves for the treatment of HepG2 cells with **1-3** after 72 h incubation.

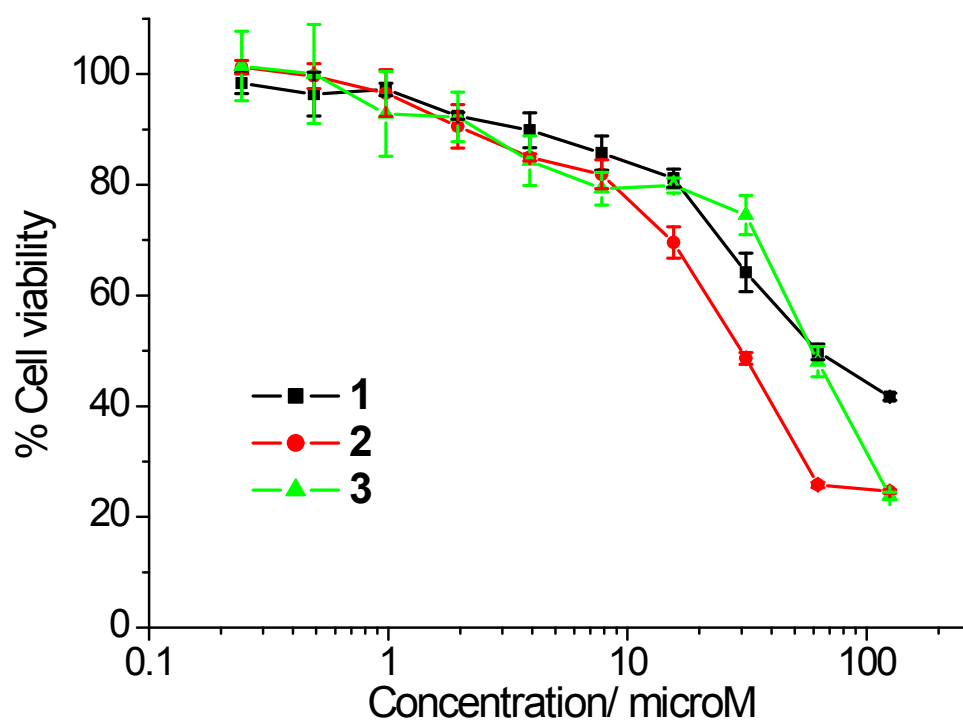

**Fig. S20** Representative dose-response curves for the treatment of GM07575 cells with **1-3** after 72 h incubation.

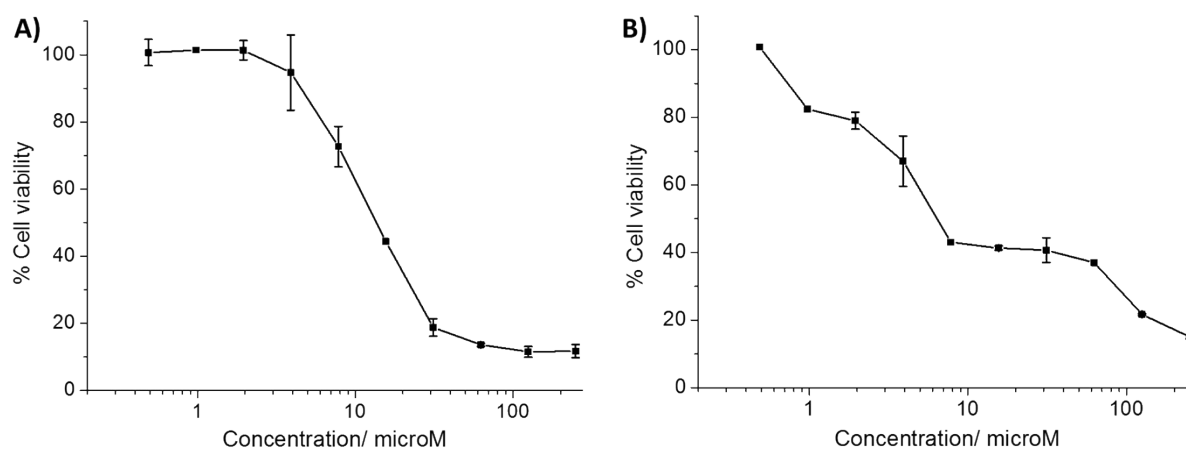

**Fig. S21** Representative dose-response curves for the treatment of (A) U2OS or (B) HepG2 cells with cisplatin after 72 h incubation.

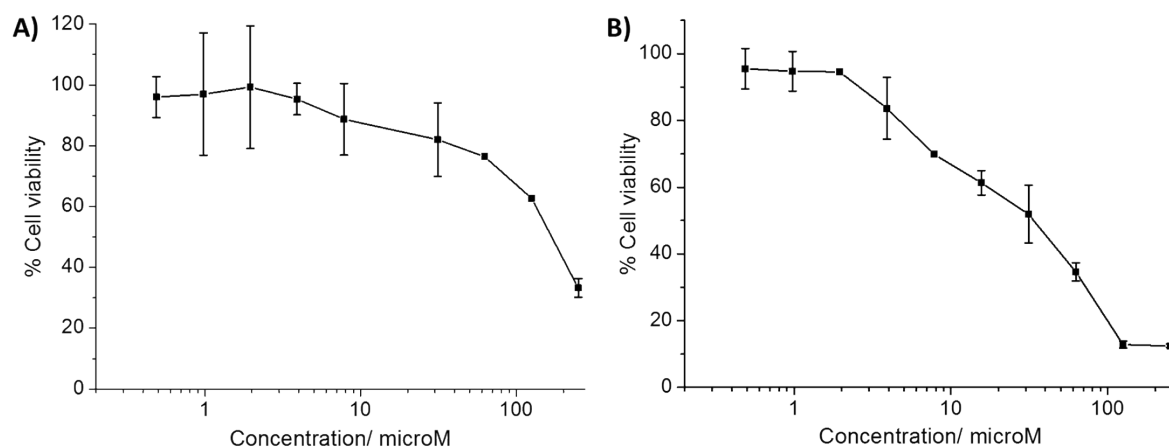

**Fig. S22** Representative dose-response curves for the treatment of (A) U2OS or (B) HepG2 cells with carboplatin after 72 h incubation.

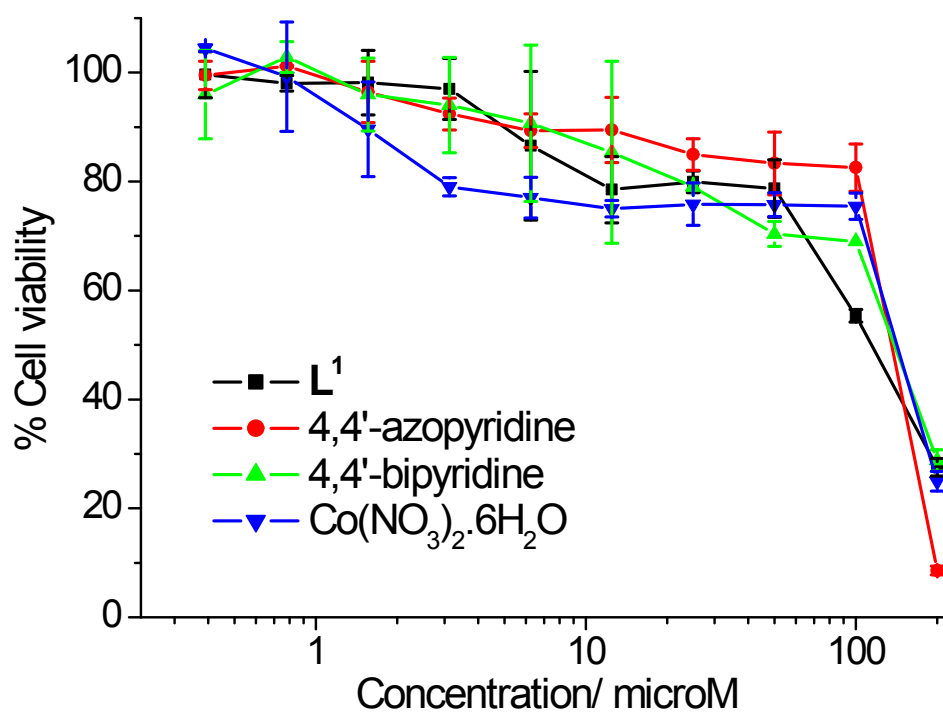

**Fig. S23** Representative dose-response curves for the treatment of U2OS cells with  $L^1$ , 4,4'-azopyridine, 4,4'-bipyridine, and  $Co(NO_3)_2 \cdot 6H_2O$  after 72 h incubation.

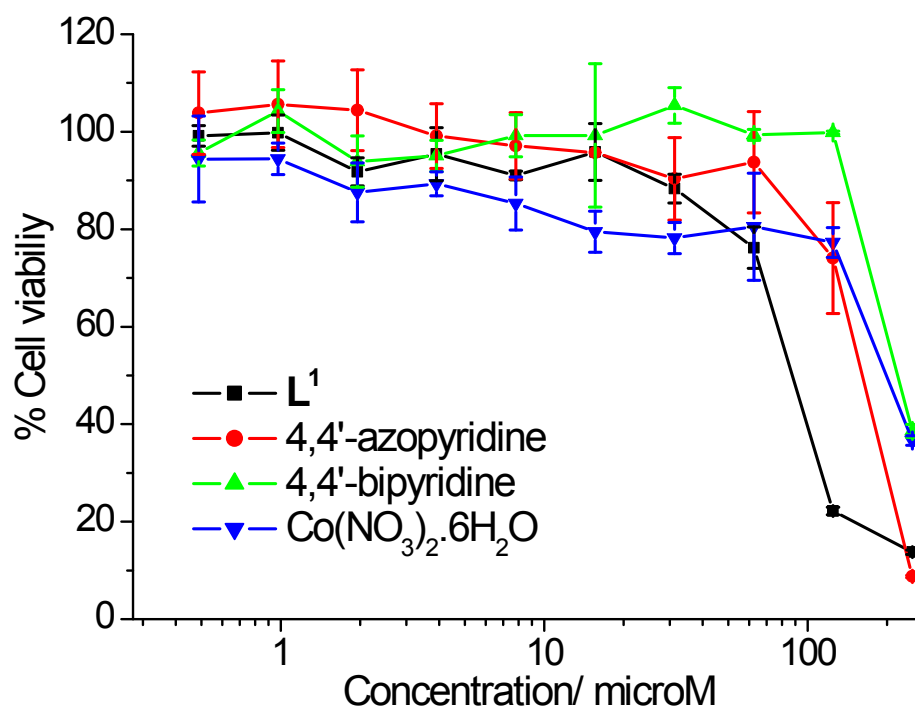

**Fig. S24** Representative dose-response curves for the treatment of HepG2 cells with  $L^1$ , 4,4'-azopyridine, 4,4'-bipyridine, and  $Co(NO_3)_2 \cdot 6H_2O$  after 72 h incubation.

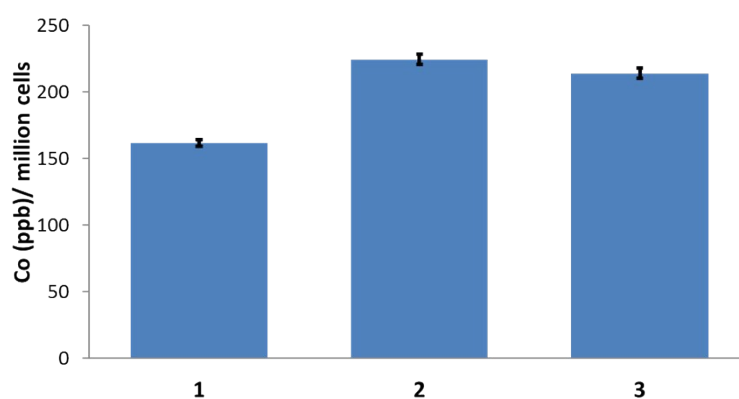

**Fig. S25** Cobalt content in U2OS cells treated with 1-3 (10 μM for 24 h).

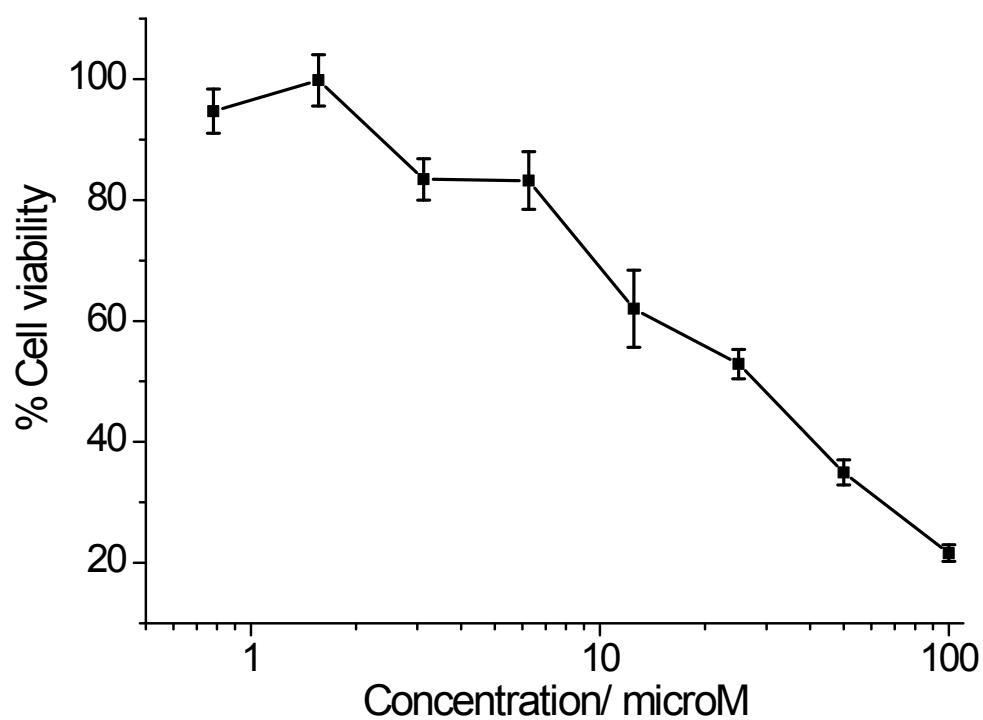

**Fig. S26** Representative dose-response curves for the treatment of U2OS cells with **2** in the presence of the p53 inhibitor, pifithrin- $\mu$  (10  $\mu$ M) after 72 h incubation.

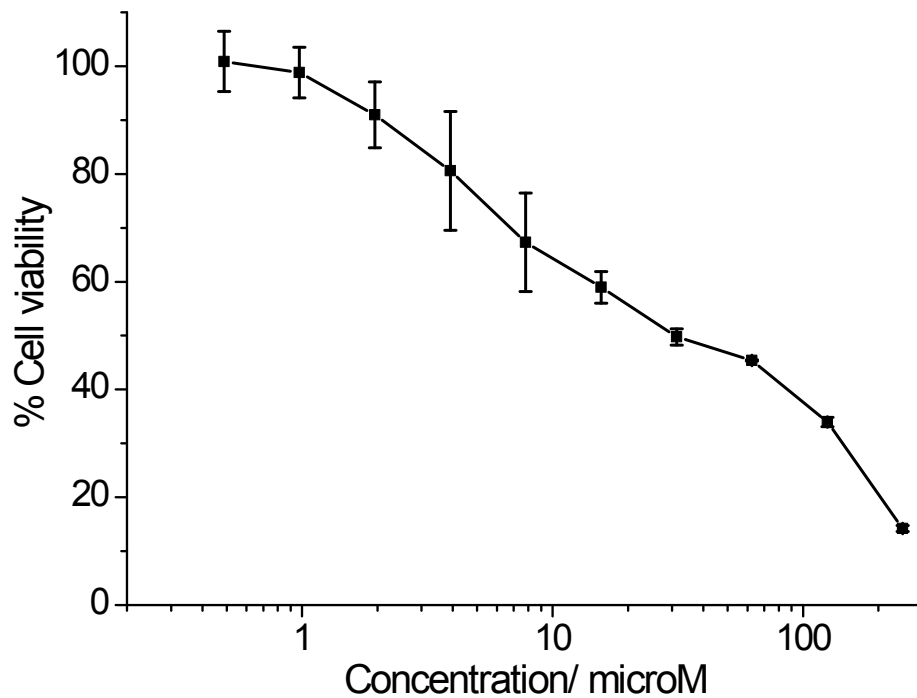

**Fig. S27** Representative dose-response curves for the treatment of HepG2 cells with **2** in the presence of the p53 inhibitor, pifithrin- $\mu$  (10  $\mu$ M) after 72 h incubation.
